1  
2  
3  
4  
5  
6  
7  
8  
9  
10  
11  
12  
13  
14  
15  
16  
17  
18

# **Mind over matter: A perceptual decision bias toward filled-in stimuli in the blind spot**

**Benedikt V. Ehinger<sup>1</sup>, Katja Häusser<sup>1</sup>, José Ossandón<sup>\*1,2</sup>, Peter König<sup>\*1,3</sup>**

<sup>1</sup> Neurobiopsychology, Institute of Cognitive Science, University of Osnabrück, Osnabrück, Germany

<sup>2</sup> Biological Psychology and Neuropsychology, University of Hamburg, Hamburg, Germany.

<sup>3</sup> Department of Neurophysiology and Pathophysiology, University Medical Center Hamburg-Eppendorf, Hamburg, Germany

\* Contributed equally

Correspondence: Benedikt V. Ehinger, Neurobiopsychology, Institute of Cognitive Science, University of Osnabrück, Albrechtstraße 28, Osnabrück, 49069, Germany - behinger@uos.de

## **Author Contributions**

BE, JO and PK designed the study. BE and KH recorded and analyzed the data. BE, JO and PK wrote and revised the manuscript.

19 **ABSTRACT**

20           Although there are no photoreceptors corresponding to the physiological blind spots, we  
21 experience visual content there as if it were veridical, when it is in fact only “filled in” based on the  
22 surroundings. Given that we have at least implicit knowledge that a stimulus is being filled in,  
23 could this knowledge bias our behavior? We asked subjects to choose between a stimulus  
24 partially presented in the blind spot that elicits filling in and another at the same eccentricity  
25 outside of the blind spot. Subjects displayed a bias toward the blind spot stimulus, where the filled-  
26 in part could have actually concealed a non-target (15.01%,  $CDI_{95}$ : 8.49%-21.08%). Two control  
27 experiments confirmed this finding. The preference for inferred versus veridical content suggests  
28 that the locally inferred percept is favored due to reduced external noise in concordance with  
29 predictive coding models of visual processing.

30

## 31 INTRODUCTION

32 In order to make optimal and adaptive decisions, animals integrate multiple sources of sensory  
33 information. This is especially important in conditions of uncertainty when information from a  
34 single sensory modality would be otherwise insufficient. For example, when animals are  
35 confronted with weakly coherent stimuli during random-dot motion experiments, their  
36 performance and corresponding neural activity vary proportionally to signal strength in a way that  
37 is consistent with the progressive integration of evidence over time <sup>1,2</sup>. Crucially, sensory  
38 integration does not only operate as a temporal accumulator because it is also possible to  
39 combine information from multiple sensory sources <sup>3-8</sup>.

40 In the case of multisensory perception, several experiments have shown that integration  
41 often occurs in a statistically optimal way. This has been best demonstrated in cue-integration  
42 experiments in which humans perform as if they were weighting the different sources of  
43 information according to their respective reliabilities <sup>9-12</sup>. This form of statistical inference has also  
44 been demonstrated for cortical neurons of the monkey brain, with patterns of activity at the  
45 population level that are consistent with the implementation of a probabilistic population code <sup>13,14</sup>.

46 In many of these sensory integration experiments, the perceptual reliability of different  
47 inputs is probed through quantitative manipulations of the inputs' signal-to-noise ratios <sup>15-17</sup>.  
48 However, some percepts are unreliable not because they are corrupted by noise but because  
49 they are internally inferred and thus intrinsically uncertain. This occurs naturally in the monocular  
50 visual field at the physiological blind spot, where content is "filled in" based on information from  
51 the surroundings. In this case, no veridical percept is possible at the blind spot location. Though  
52 changes in reliability due to noise directly result in behavioral consequences, the effects of the  
53 qualitative difference between veridical and inferred percepts that are otherwise apparently  
54 identical is unknown.

55 We recently reported differences in the processing of veridical and inferred information at  
56 the level of EEG responses<sup>18</sup>. In the present experiment, we address whether such an

57 assessment of a dichotomous, qualitative difference in reliability is available for perceptual  
58 decision-making. Using 3D shutter glasses, we presented one stimulus partially in the  
59 participant's blind spot to elicit filling in and a second stimulus at the same eccentricity in the nasal  
60 field of view outside of the blind spot. The subject's task was to indicate which of the two stimuli  
61 was continuously striped and did not present a small orthogonal inset (see Fig. 1A). Crucially,  
62 stimuli within the blind spot are filled in and thus perceived as continuous, even when they present  
63 an inset. In the diagnostic trials, both stimuli were physically identical and continuous, and  
64 subjects were confronted with an ambiguous decision between veridical and partially inferred  
65 stimuli.

66 We evaluated two mutually exclusive hypotheses in which perceptual decision-making  
67 could proceed when confronted with an ambiguous decision between veridical and inferred  
68 percepts. In the first case, agents are unable to make perceptual decisions based on an implicit  
69 assessment of differences in reliability between stimuli that otherwise look identical. Therefore,  
70 subjects would have an equal chance of selecting stimuli presented inside or outside the blind  
71 spot. Alternatively, it might be possible to use the information about the reduced reliability of filled-  
72 in information. Therefore, we expect subjects to follow an optimal strategy and trust a stimulus  
73 presented outside the blind spot, where the complete stimulus is seen, more often than when the  
74 stimulus is presented inside the blind spot, where it is impossible to know the actual content of  
75 the filled-in part.

76

77 **RESULTS**

78 We conducted three experiments (see Fig. 1 and the methods for a detailed task description).  
79 The first experiment tested the presence of a bias against the blind spot location; the other two  
80 experiments were replications of the first experiment with additional control conditions to test the  
81 existence of biases between the nasal and temporal fields of view at locations that do not  
82 correspond with the blind spot.

83 In the first experiment, 24 subjects performed a sometimes ambiguous 2-AFC task in  
84 which they had to indicate which of the two stimuli was continuously striped instead of presenting  
85 a small orthogonal inset (Fig. 1A). The stimuli were presented simultaneously in the periphery at  
86 external locations corresponding to the blind spots (Fig. 1B, C). We used a 3D monitor and shutter  
87 glasses that allowed for controlled monocular display of the stimuli. The first experiment consisted  
88 of mixed perceptually ambiguous and unambiguous trials that we used to test the two competing  
89 hypotheses on whether the reliability assessments of these conditions differed for decision-  
90 making.

91

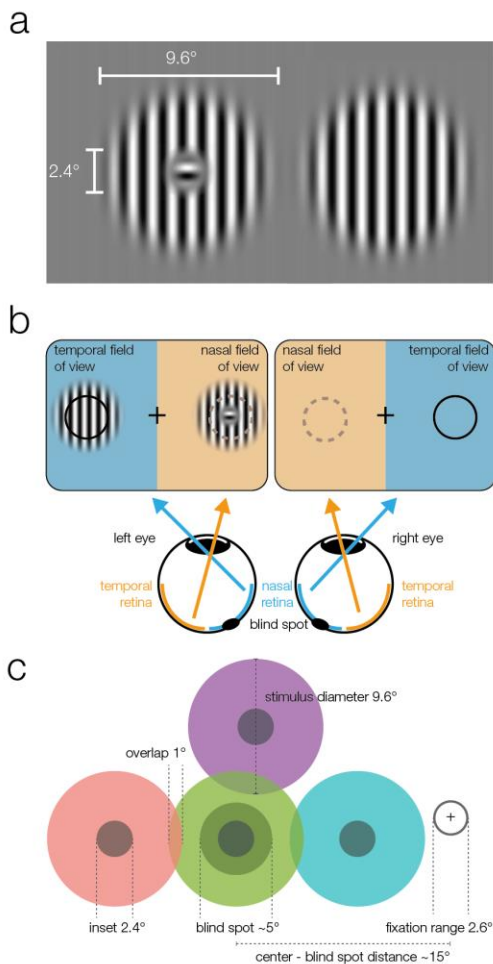

92

### 93 **Figure 1: Stimuli and stimulation**

94 **a)** Striped stimuli used in the study. The inset was set to ~50% of the average blind spot size. The  
95 global orientation of both stimuli was the same, but in different trials it could be either vertical (as  
96 shown here) or horizontal (not shown).

97

98 **b)** Two images were displayed using shutter glasses. For example, the left stimulus could be  
99 shown either in the temporal field of view (nasal retina) of the left eye (as in the plot) or in the  
100 nasal field of view (temporal retina) of the right eye (not shown). This example trial is  
101 unambiguous: The stimulus with an inset can be seen veridically and, therefore, the correct  
102 answer in this trial is to select the left stimulus.

103

104 **c)** The locations of stimulus presentation in the three experiments. All stimuli were presented  
105 relative to the individual blind spot, and the average blind spot location is shown here. All three  
106 experiments included the blind spot location (green). In the second experiment, effects at the blind  
107 spot were contrasted with a location above it (purple). In the third experiment, the contrasts were  
108 in positions located to the left or the right of the blind spot. Please note that the contrast between  
109 locations is across trials, and stimuli are presented at symmetrical positions in any given trial.

110

111 In the unambiguous trials, an orthogonal inset was present in one of the stimuli.  
112 Importantly, in these trials, the stimulus with the inset was outside the blind spot and therefore  
113 clearly visible. As expected, subjects performed with near perfect accuracy (Fig. 2, unambiguous  
114 trials), choosing the continuous stimulus in an average of 98.8% of trials (95%-quantile [96.4%–  
115 100%]).

116  
117 There were two types of ambiguous trials. In the first type (Fig. 2, ambiguous control), one  
118 of the following applied: both stimuli were continuous and appeared outside the blind spots in the  
119 nasal visual fields (Fig. 2, line 3); both were continuous and appeared inside the blind spots (Fig.  
120 2, line 4); or one was continuous, the other had an inset, and both appeared inside the blind spots  
121 either in the left/right and right/left ones (Fig. 2, lines 5 and 6). The central parts of the stimuli,  
122 where the insets could appear, were perfectly centered inside the blind spot when presented (Fig.  
123 1A). These stimuli were thus perceived as continuous due to filling in of the surrounding visible  
124 part of the stimuli. Thus, in all four versions, subjects perceived two identical stimuli, and there  
125 was no single correct answer. In this type of ambiguous trial, subjects showed a small global  
126 leftward bias and chose the left stimulus in 53.6% of trials (Fig. 2, dashed line). In addition, no  
127 difference can be seen between the perception of pairs of filled-in stimuli and pairs of veridical  
128 continuous stimuli (Fig. 2, line 3 vs. 4-6). This type of ambiguous control trial clearly shows that  
129 fill-in is perfect in our experiment.

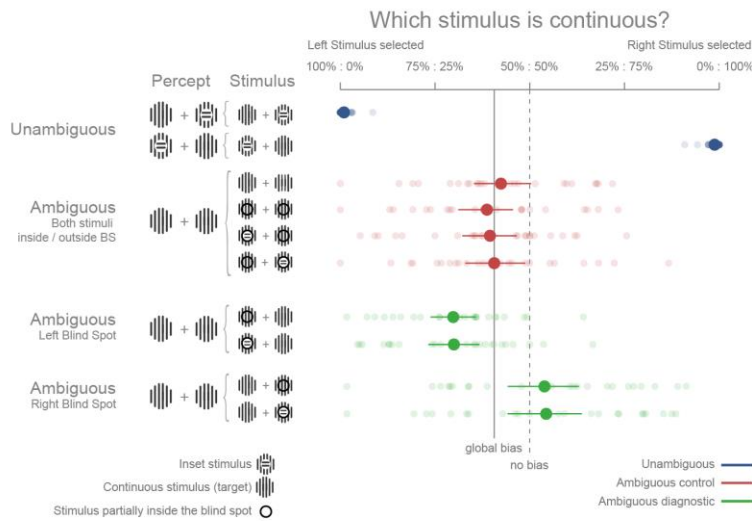

130

131 **Figure 2: First experiment**

132 In the first column, the percept of the subjects and the actual stimulation is contrasted. Stimuli  
 133 containing a dark-line circle were presented in the blind spot, and thus an inset stimulus is  
 134 perceived as a continuous stimulus. In the graph, the average response of each subject (n=24),  
 135 and the group average with 95% bootstrapped CI are shown. The unambiguous trials show that  
 136 the subjects were almost perfect in their selection of the continuous stimulus (blue). For the  
 137 ambiguous control trials (red), both stimuli were presented either outside or inside the blind spot.  
 138 Here only a global bias toward the left stimulus can be observed (solid line, the mean across all  
 139 observed conditions). Note that the performance of presenting an inset in the blind spot is identical  
 140 to presenting a continuous stimulus in the blind spot. The ambiguous diagnostic conditions  
 141 (green) show the bias toward the blind spot for either side.  
 142

143 The second type of perceptually ambiguous trial allowed us to directly address our  
 144 hypotheses. Here, the important manipulation is that we can show stimuli at symmetrical  
 145 locations, with one inside and the other outside the blind spot (Fig. 2, ambiguous diagnostic). This  
 146 allowed us to test whether subjects show a bias against the stimulus that is partially inferred (inset  
 147 area inside the blind spot) and in favor of the veridical stimulus (in the opposite visual field). Note  
 148 here, that selecting the filled-in stimulus is a sub-optimal decision: the stimulus presented partially  
 149 in the blind spot is the only one who could possibly contain the inset. This is explicit in the cases  
 150 where an inset is shown in the blind spot but rendered invisible by fill-in (Fig.2, line 8 and 10). For  
 151 analysis, we modeled the probability increase of choosing the right stimulus with predictors if the  
 152 right stimulus was presented in either the temporal visual field of the right eye (blind spot) or the



153 nasal visual field of the left eye (non-blind spot), a similar factor was used for the left stimulus.  
154 Consequently, the two one-sided model estimates were collapsed to a single measure.

155 Figure 2 (ambiguous diagnostic) shows that subjects indeed presented a bias. However,  
156 in contrast to our expectations, subjects were more likely to choose the filled-in percept (15.01%,  
157  $CDI_{95}$  8.49%–21.08%). In other words, when subjects had to decide which of the two stimuli (both  
158 perceived as being continuous, and in most cases actually physically identical) was less likely to  
159 contain an inset, they showed a bias for the one in which the critical information was not sensed  
160 but inferred. Remarkably, this result is at odds with both of the experimental predictions that  
161 postulated a bias in favor of the veridical stimulus or no bias.

162 In the second experiment, we focused on replicating the unexpected result of experiment  
163 1 and evaluating whether the blind spot bias observed was due to systematic differences between  
164 nasal and temporal retinae. In experiment 1, we presented stimuli at mirror eccentricities inside  
165 and outside the blind spot. Therefore, we had to present them to opposite sides of one eye's  
166 retina (temporal and nasal respectively; see Fig. 1B). Otherwise, the stimuli would have appeared  
167 at the same external coordinates and led to binocular rivalry<sup>19</sup>. In experiment 2, we tested whether  
168 the bias in experiment 1 was unspecific to the blind spot location but related to known differences  
169 between the temporal and nasal retina (for a review, see <sup>20</sup>). There is higher photoreceptor  
170 density<sup>21</sup>, spatial resolution<sup>22</sup>, luminance discrimination<sup>23</sup> and orientation discrimination<sup>24</sup> at  
171 locations that project to the nasal retina (the temporal visual field where the blind spots are  
172 located). Thus, we repeated our experiment with a new group of subjects ( $n=27$ ) and an additional  
173 condition. In this new condition, the two stimuli were displayed at symmetrical locations above the  
174 blind spot (25° above the horizontal meridian; see Fig. 1C). The results of this second experiment  
175 (Fig. 3A triangles, Fig. 3B for model parameters) replicate the previous observations of  
176 experiment 1. Subjects showed a bias for selecting the stimulus presented inside the blind spot  
177 (12.5%,  $CDI_{95}$  7.35%–17.49%). However, we also found a bias in the control condition toward the  
178 stimuli presented in the temporal visual field above the blind spot (6.63%,  $CDI_{95}$  0.77%–12.3%). The

179 bias was nevertheless stronger inside the blind spot (paired-diff: 6.11%,  $CDI_{95}$  1.16%–10.78%). In  
180 summary, on top of the bias inside of the blind spot area, we observed that subjects also showed  
181 an additional, smaller bias for stimuli presented to the nasal retina (temporal visual field).

182 We performed an additional third experiment on a new group of subjects ( $n=24$ ). Here, we  
183 compared biases in the blind spot to two other control conditions flanking the blind spot region  
184 from either left or right (Fig. 3A squares). The blind spot location again revealed the strongest effect  
185 (13.18%  $CDI_{95}$  6.47%–19.64%), while the locations inwards and outwards resulted in a 2.85% and  
186 4.8% bias, respectively, for the temporal visual field ( $CDI_{95}$  -1.1%–6.65%;  $CDI_{95}$  0.58%–8.89%). The  
187 bias of both control locations was different from the bias of the blind spot location (inward vs. BS:  
188 10.51%,  $CDI_{95}$  3.55%–17.29%; outward vs. BS: 8.61%,  $CDI_{95}$  0.98%–16.04%). In this experiment, as  
189 in experiments 1 and 2, we observed a bias specific to the blind spot region.

190

191

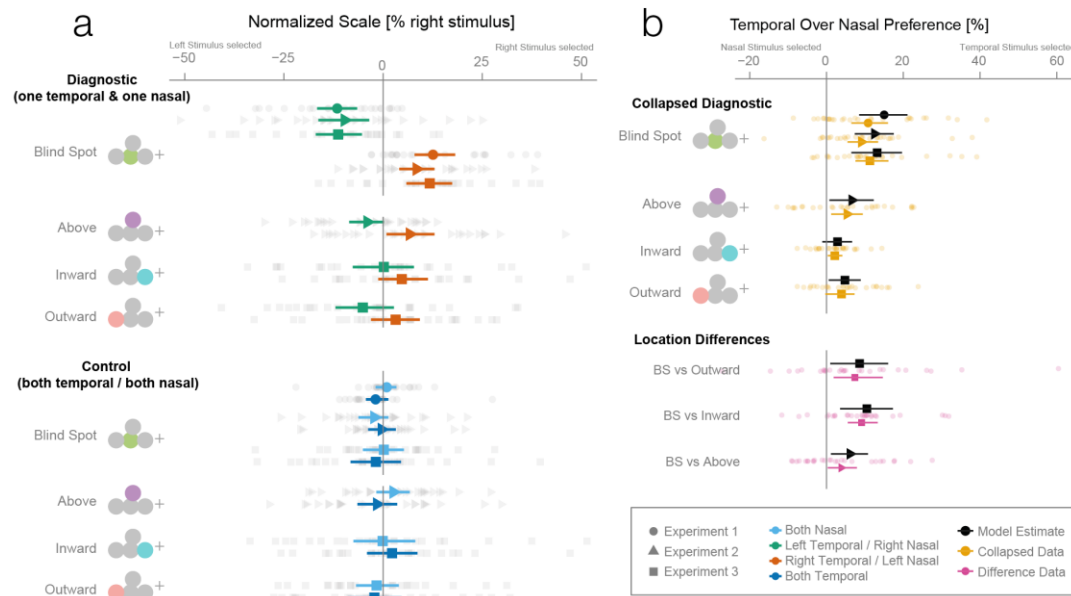

192

193 **Figure 3: All experiments**

194 **a)** Fraction of choosing the right stimulus dependent on location (indicated by icon) and  
 195 experiment (Exp. 1: n=24, Exp. 2: n=27, Exp. 3: n=24). For plotting purposes we preprocessed  
 196 the data by subtracting the global bias. Each gray dot depicts one subject. The error bars depict  
 197 mean and 95% bootstrapped CI. A bias for the blind spot was visible in the form of “left” responses  
 198 when the left stimulus was presented in the temporal visual field of the left eye (green, nasal /  
 199 blind spot retina of the left eye) and of more “right” responses when the right stimulus was  
 200 presented in the temporal visual field of the right eye (green, nasal / blind spot of the right eye) in  
 201 all experiments. A bias was visible in the other tested locations, but it was much smaller. Control  
 202 conditions show that there was no bias if the stimuli were shown either both inside the temporal  
 203 fields (dark blue) or both inside the nasal fields (light blue).  
 204

205 **b)** Yellow color indicates combined data over the left and right side. Black color indicates the  
 206 posterior 95% credibility interval of a logistic mixed linear model. A bias for the blind spot  
 207 stimulus was clearly evident in all experiments. A much weaker effect was present in the other tested  
 208 locations. The within-subject differences between the blind spot and the other locations are  
 209 depicted in purple, and the respective modeled difference is shown in black.  
 210

211

212 A bias for the temporal visual field, especially the blind spot, can also be reflected in the  
 213 distribution of reaction times. We compared the reaction times of trials where subjects selected a

214 stimulus in the temporal visual field against trials where the stimulus in the nasal visual field was  
215 selected. No prior hypotheses were formulated for the reaction time. Thus, in contrast to the other  
216 analyses presented here, these are explorative. We observed an average reaction time of 637  
217 ms (minimum subject average: 394 ms, maximum 964 ms) in the first experiment (Fig. 4A). We  
218 used a linear mixed model to estimate the reaction time difference for selecting a stimulus  
219 presented inside the blind spot (temporally) against one outside the blind spot (nasally). In the  
220 first experiment (Fig. 4B), after excluding three outliers, we observed this effect with a median  
221 posterior effect size of 13 ms ( $CDI_{95\%}$  2–42 ms) faster reaction times when selecting the blind  
222 spot region. The three outliers (marked red in Fig. 4) were identified visually and removed because  
223 they were distinctively different from the rest of the population. The mean of the outliers was 5.2  
224 SD away from the remaining subjects. The outliers were nevertheless in the direction of the  
225 reaction time effect and did not change its significance (with outliers, 63 ms,  $CDI_{95}$  7–124 ms).  
226 However, faster reaction times while selecting the blind spot stimulus were not present in the  
227 other two experiments. The nominal differences were in the same direction as experiment 1 but  
228 comparably small and insignificant (4 ms,  $CDI_{95}$  -14–23 ms; and 22 ms,  $CDI_{95}$  -13–57 ms). Similar  
229 results were obtained for the other locations tested (above: 8 ms,  $CDI_{95}$  -38–53 ms; outward: 2  
230 ms  $CDI_{95}$  -13–16 ms; inward: 4 ms,  $CDI_{95}$  -29–37 ms). Furthermore, an analysis of the combined  
231 data shows no evidence for a reaction time effect in any location, and the blind spot estimate  
232 changes here to 12 ms ( $CDI_{95}$  -23–47 ms). Even though the signs of all three experiments indicate  
233 that the reaction time for nasal stimuli is slower than for temporal ones despite the large total  
234 number of subjects ( $n=75$ ), the results of our experiments remain inconclusive on this issue.

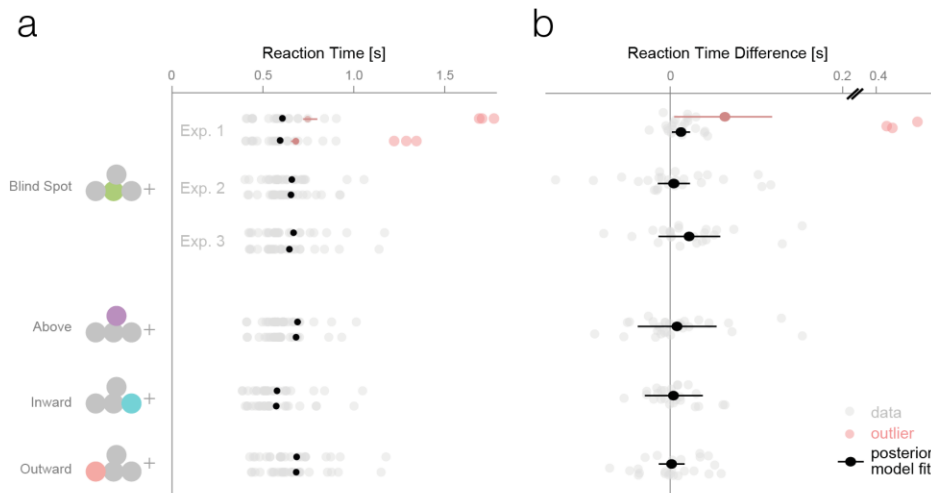

235

#### 236 **Figure 4: Reaction Times**

237 **a)** Reaction times of nasal chosen trials (upper row of each pair) and temporal chosen trials (lower  
238 row of each pair). Black dots indicate the average reaction time across subjects with 95%  
239 bootstrapped CI (in A too small to display). Red circles depict the removed outliers and the mean  
240 with the outliers included.

241  
242 **b)** Nasal chosen minus temporal chosen reaction times. The summary statistics depict the 95%  
243 CDI of the posterior effect estimate. We observe a bias in the first experiment and the blind spot  
244 with and without the outlier, but not in the other experiments or conditions.

245

246

247 For an overview of all experiments and the results of a logistic model that combines all  
248 selection-bias experiments, see Table 1 of the Appendix. In the combined model, we did not find any  
249 differences between the temporal field effects at locations other than the blind spots. In other  
250 words, the temporal field effects of the locations inwards, outwards and above were not different  
251 from each other. For the sake of clarity, we combined these location levels. Keeping everything  
252 else constant, we expect that if we present one stimulus in the blind spot against the equidistant  
253 nasal location, we are 13.44%  $CDI_{95}$  9.94%–16.70% more likely to choose the stimulus in the  
254 blind spot. This bias is stronger than the effect observed elsewhere in the temporal field by 8.89%  
255  $CDI_{95}$  5.01%–12.53. In summary, subjects showed a robust bias for the blind spot locations that  
256 could not be explained by a non-specific bias for the temporal visual field. In the case of this task,

257 when confronted with an ambiguous choice between veridical and inferred sensory information,

258 human subjects showed a suboptimal bias for inferred information.

259

260 **DISCUSSION**

261 In three experiments, we showed that when confronted with identical physical stimulation in a  
262 simple decision task, subjects biased their decisions toward stimuli in the temporal field of view.  
263 Importantly, subjects showed a consistent bias for blind spot inferred percepts, which was  
264 stronger than the bias at any other location in the temporal visual field.

265 Why do subjects choose the blind spot location when it is objectively the least reliable?  
266 Our interpretation takes the results at face value: subjects must possess at least implicit  
267 information about whether a percept originates from the blind spot in order to show a bias for it.  
268 At the same time, the veridical information from the other stimulus is also available. This indicates,  
269 that at least for the task presented here, perceptual decision-making can rely more on inferred  
270 than veridical information, even when there is knowledge in the system about the nature of this  
271 signal and its reduced reliability as a consequence. Thus, a suboptimal decision is made.

272 In the following, we propose two possible explanations for this effect. The first explains the  
273 effect simply by stating that the blind spot is 'special' because the information around the optic  
274 disc is sampled differently. The second explanation is based on the general notion of predictive  
275 coding: the reduced noise in the inferred percept reduces the bottom-up prediction error.

276 In the results section, we introduced the evidence for psychophysical differences between  
277 the nasal and temporal visual field, which motivated the control experiments. In the same vein,  
278 the parts of the retina surrounding the optic disc might present further enhancements for  
279 perception that are useful for a better estimation of the contents of the blind spot area. That means  
280 that subjects could perceive the stimulus as more veridical due to enhanced sensory perception  
281 at the boundary of the blind spot. Some weak evidence for this has been reported that indicates  
282 better disparity estimates (Vernier task) in the peri-blind spot area compared to equally eccentric  
283 locations in the nasal visual field. This effect seems to happen only when the element extends  
284 into the blind spot and thus produces filling in and not for other filling in processes derived from

285 pathological scotomas <sup>25</sup>. This would indicate that the low-level, bottom-up information gained  
286 from the blind spot is superior to the veridical input of other retinal origin.

287 Our alternative explanation is based on the framework of predictive coding. For this task,  
288 we assume that predictive coding could work both as a way of predicting future sensory input  
289 (task context) and static predictions based on spatial context (the filling-in). In our task, this would  
290 mean that subjects generated predictions of continuous stimuli in the ambiguous trials. The  
291 predicted sensory input was then compared to the incoming sensory input, and an error signal  
292 representing the mismatch was returned. The filled-in signal might have had less perceptual  
293 noise. This was partially explained by the hypothesized integration process over boundary  
294 neurons <sup>26</sup> that act as smoothers and further explained by the fact that no unique perceptual noise  
295 from the senses reached the low-level visual areas near the blind spot (as there are no sensory  
296 inputs from the stimulus in the blind spot). Thus, with less noise, the inferred sensory input at the  
297 V1 blind spot location has a higher signal-to-noise ratio and will match the predicted stimulus  
298 signal better. A better match results in a smaller prediction error and thus a higher credibility at  
299 later stages. A faster reaction time to the filled-in stimulus compared to the veridical stimulus could  
300 be taken as further evidence that the integration process is indeed biased with less noise. With  
301 respect to reaction times, our experiments remain inconclusive, and further research is needed  
302 to fully support this assumption. In conclusion, predictive coding can best explain our results with  
303 the additional assumptions that the signal-to-noise ratio of the blind spot percept is higher due to  
304 the fill-in process and/or the blind spot lacking unique noise from the eye.

305 In a recent EEG study with human subjects, we demonstrated that a qualitative reliability  
306 assessment exists at the neural level in the form of low- and high-level trans-saccadic predictions  
307 of visual content <sup>18</sup>. Notably, active predictions of visual content differed between inferred and  
308 veridical visual information presented inside or outside the blind spot, respectively. We could not  
309 find differences between low-level error signals, but high-level error signals differed markedly. We  
310 concluded that the inferred content is processed as *if* it were veridical for the visual system, but



311 knowledge of its reduced precision is nevertheless preserved at later processing stages. Thus,  
312 only an absence of a bias for the veridical peripheral stimulus could have been explained by this  
313 finding of early *as if* veridical processing. The participants in the EEG study were a subset of the  
314 subjects of experiment 1 and thus the same subjects who showed activity congruent with a  
315 differential processing of filled-in and veridical inputs. They nevertheless choose the unreliable,  
316 filled-in stimulus in this perceptual decision-making task. In other words, the implicit knowledge  
317 that a filled-in stimulus is less reliable seems to be unavailable for perceptual decision-making.

318         In conclusion, we find a new behavioral effect where subjects reliably prefer a partially  
319 inferred stimulus over a veridical one. Though both appear to be continuous, the filled-in one could  
320 hide an inset and is therefore less reliable. In this perceptual decision-making task, in contrast to  
321 predictions about future content over saccades, subjects do not make use of high-level  
322 assessments about the reliability of the filled-in stimulus. Even more so, they prefer the unreliable  
323 percept, possibly due to physiologically superior signal extraction, less noise accumulation or  
324 both.

325

326 **METHODS**

327 Many of the methods are taken from Ehinger et al. 2015. All data and analyses are available at  
328 <https://osf.io/wphbd/>.

329

330 **Subjects:**

331 Overall, 136 subjects took part in the experiments. Of the subjects, 33% (n=45) were removed due to  
332 the screening experiments described below. An additional 4% (n=6) were removed due to low  
333 performance ([n=2, <75%] in at least two conditions with a visible unique inset) or because they  
334 responded to the stimuli with the inset stimulus instead of the continuous stimulus (n=4). The  
335 experimental data were not recorded in 7% (n=10) due to eye tracking calibration problems (n=3) and  
336 other issues during data collection (n=7). The remaining 75 subjects were recorded and analyzed in  
337 the following experiments.

338 For the first experiment, we analyzed the data of 24 subjects (average age 21.9 years, age  
339 range 18–28 years, 12 female, 20 right-handed, 16 right-eye dominant) with a subset of 15 taking part  
340 in the EEG study of Ehinger et al. In the second experiment, we analyzed the data of 27 subjects  
341 (average age 22.4 years, age range 19–33 years, 15 female, 25 right-handed, 19 right-eye dominant).  
342 In the third, 24 subjects (average age 21.9 years, range 19–27 years, 19 female, 23 right-handed, 16  
343 right-eye dominant).

344 All subjects gave written informed consent, and the experiment was approved by the local  
345 ethics committee. We disclose that in the second experiment, we planned to record 18 subjects,  
346 but the results of the initial analysis with this first group were not conclusive about differences  
347 between the location inside and the location above the blind spot. Therefore, we decided to  
348 increase the number of subjects by 50% (n=9).

349 **Screening:**

350 As described above, many subjects failed a simple screening test. In this pre-experiment,  
351 we showed a single stimulus in the periphery either inside or outside the blind spot in the left or  
352 right visual field. In two blocks of 48 trials, subjects indicated which stimulus (no inset vs. inset)  
353 had been perceived. We thought of this simple experiment to evaluate our blind spot calibration  
354 method, as an inset stimulus inside the blind spot should have been reported as no inset. The  
355 first block was used as a training block. In the second block, we evaluated the performance in a  
356 conservative way. If the performance was below 95% (three errors or more), we aborted the  
357 session because the participant was deemed to be too unreliable to proceed further with our  
358 experiment. Later analysis suggested that the errors of those subjects were unrelated to the blind  
359 spot. There was no clear pattern among subjects in terms of eye-lateralization or location (i.e.,  
360 inside vs. outside). In most cases the low performance was probably due to inattention. Overall,  
361 about 66% (n=75) of recruited subjects passed this test and were admitted to subsequent  
362 experiments.

363

#### 364 **Eye Tracking, Screen, Shutter Glasses**

365 A remote, infrared eye-tracking device (Eyelink 1000, SR Research) with a 500 Hz sampling rate  
366 was used. The average calibration error was kept below  $0.5^\circ$  with a maximal calibration error of  
367  $1.0^\circ$ . Trials with a fixation deviation of  $2.6^\circ$  from the fixation point were aborted. We used a 24-  
368 inch, 120 Hz monitor (XL2420t, BenQ) with a resolution of 1920x1080 pixels in combination with  
369 consumer-grade shutter glasses for monocular stimulus presentation (3D Vision, Nvidia, wired  
370 version). The shutter glasses were evaluated for appropriate crosstalk/ghosting using a custom-  
371 manufactured luminance sensor sampling at 20 kHz. The measured crosstalk at full luminance  
372 was 3.94%. The subject screen distance was 60cm in the first two experiments and 50cm in the  
373 third experiment.

374

#### 375 **Stimuli**

376 Modified Gabor patches with a frequency of 0.89 cycles/° and a diameter of 9.6° were generated.  
377 Two kinds of patterns were used (Fig. 1A): one completely continuous and one with a small  
378 perpendicular inset of 2.4°. For comparison, the blind spot typically has a diameter of 4°–5°. The  
379 Gabor had constant contrast in a radius of 6.3° around the center. This ensured the same  
380 perception of the continuous stimulus outside the blind spot in comparison to a filled-in stimulus,  
381 where the inner part is inside the blind spot. To account for possible adaptation effects, horizontal  
382 and vertical stimuli were used in a balanced and randomized way across the trials. Stimuli were  
383 displayed using the Psychophysics Toolbox<sup>27</sup> and Eyelink Toolbox<sup>28</sup>. The stimuli were displayed  
384 centered at the individually calibrated blind spot location. The stimulus at the location above the  
385 blind spot in experiment 2 was at the same distance as the blind spot but was rotated by 25° to  
386 the horizon around the fixation cross. For the inward and outward condition of experiment 3,  
387 stimuli were moved nasally or temporally by 8.6°, thus the stimuli had an overlap of only 1°. Less  
388 overlap is not possible without either cutting the border of the screen or overlapping with the  
389 fixation cross.

390

### 391 **Task**

392 After a fixation period of 500 ms, we presented two stimuli simultaneously in the left and right  
393 peripheries. Subjects were instructed to indicate via button press (left or right) which stimulus was  
394 continuous. Each stimulus was presented either in the temporal or nasal field of view. In some  
395 trials, the required response was unambiguous, when one of the stimuli showed an inset and the  
396 other did not (and at least the inset stimulus was presented outside the blind spot). In many trials  
397 (80% of all experiments and locations, 46% when the stimulus was shown above the blind spot  
398 in experiment 2), both stimuli were continuous and no unique correct answer existed. All trials  
399 were presented in a randomized order. If the subject had not given an answer after 10 seconds,  
400 the trial was discarded and the next trial started. All in all, subjects answered 720 trials over 6  
401 blocks; in experiment 1 the trials were split up into two sessions. After each block the eye tracker

402 and the blind spot were re-calibrated. After cleaning trials for fixation deviation and blinks, an average  
403 of 498 trials (90%-quantile: 402, 567) remained. For two subjects, only 360 trials could be recorded.

404

#### 405 **Blind Spots**

406 In order to calibrate their blind spots, subjects were instructed to use the keyboard to move a  
407 circular monocular probe on the monitor and to adjust the size and location to fill the blind spot  
408 with the maximal size. They were explicitly instructed to calibrate it as small as necessary to  
409 preclude any residual flickering. The circular probe flickered from dark gray to light gray to be  
410 more salient than a probe with constant color <sup>29</sup>. All stimuli were presented centered at the  
411 respective calibrated blind spot location. In total, each subject calibrated the blind spot six times.  
412 For the following comparisons of blind spot characteristics we evaluated one-sample tests with  
413 the percentile bootstrap method (10,000 resamples) of trimmed means (20%) with alpha = 0.05  
414 <sup>30</sup>. For paired two-sample data, we used the same procedure on the difference scores. We used  
415 bias-corrected, accelerated 95% bootstrapped confidence intervals of the trimmed mean (20%).  
416 In line with previous studies <sup>18,31</sup>, the left and right blind spots were located horizontally at  $-15.48^\circ$   
417 (SD=0.49° CI:[-15.68°, -15.30°]) and  $15.8^\circ$  (SD=0.56° CI:[15.59°, 16.02°]) from the fixation cross. The  
418 mean calibrated diameter was  $4.92^\circ$  (SD=0.43° CI:[4.76°, 5.08°]) for the left and  $5.13^\circ$  (SD=0.4°  
419 CI:[4.98°, 5.29°]) for the right blind spot. Blind spots did significantly differ in size ( $p < 0.001$ , CI:[-0.26°, -  
420 0.08°]) and in absolute horizontal position (in relation to the fixation cross;  $p < 0.001$ , CI:[0.21°, 0.43°]);  
421 on average, the right blind spot was  $0.32^\circ$  further outside of the fixation cross. No significant difference  
422 was found in the vertical direction ( $p = 0.86$ ), but this is likely due to the oval shape of the blind spot in  
423 this dimension and the usage of a circle to probe the blind spot. These effects seem small, did not  
424 affect the purpose of the experiments and will not be discussed further.

425

#### 426 **GLMM Analysis**

427 We fitted a Bayesian logistic mixed-effects model predicting the probability of responding “right”  
428 with multiple factors that represent the temporal over nasal bias and several other covariates  
429 described below. Because we were interested in the bias between the nasal fields and the  
430 temporal fields of view, we combined both predictors for the left and right temporal (and nasal,  
431 respectively) locations and reported the combined value.

432 Data were analyzed using a hierarchical logistic mixed effects models fitted by the No-U-  
433 Turn Sampler (NUTS, STAN Development Team). The model specification was based on an  
434 implementation by Sorensen and Vasisth <sup>32</sup>. In the results section we report estimates of linear  
435 models with the appropriate parameters fitted on data of each experiment independently. We also  
436 analyzed all data in one combined model: there were no substantial differences between the  
437 results from the combined model and the respective submodels (Appendix table 1). The models  
438 are defined as follows using the Wilkinson notation:

439

$$440 \text{ answer}_{right} \sim 1 + \text{Temporal}_{Left} * \text{Location} + \text{Temporal}_{Right} * \text{Location} + \text{Answer}_{right}(t - 1) +$$
$$441 \text{ Handedness}_{Right} + \text{DominantEye}_{right} +$$
$$442 (1 + \text{Temporal}_{Left} * \text{Location} + \text{Temporal}_{Right} * \text{Location} + \text{Answer}_{right}(t - 1) | \text{Subject})$$
$$443 \text{ Answer}_{i \text{ right}} \sim \text{Bernoulli}(\theta_i)$$

$$444 \theta_i = \text{logit}^{-1}(X_{within}\beta_{within} + X_{between}\beta_{between} + N(0, \tau X_{within}) + N(0, e))$$

445 Two factors were between subjects: *handedness* and *dominant eye*. In total, we have four  
446 within-subject factors, resulting in eight parameters: There are two main factors representing  
447 whether the left, and respectively the right, stimulus was inside or outside the *temporal* field.  
448 Depending on the experiment, the main factor *location* had up to three levels: the stimuli were  
449 presented outwards (3rd experiment), inwards (3rd), above (2nd) or on (1st, 2nd, 3rd) the blind  
450 spot. In addition, we modeled the interactions between location and whether the left stimulus (and  
451 the right stimulus, respectively) was shown temporally. In order to assure independence of  
452 observation, an additional within-subject main factor *answer(t-1)* was introduced, which models

453 the current answer based on the previous one. In frequentist linear modeling terms, all within-  
454 subject effects were modeled using random slopes clustered by subject and a random intercept  
455 for the subjects. We used treatment coding for all factors and interpreted the coefficients  
456 accordingly.

457 In the model we estimated the left and right temporal field effects separately. For the  
458 statistical analysis, we combined these estimates by inverting the left temporal effect and  
459 averaging with the right temporal effect. We did this for all samples of the mcmc-chain and then  
460 took the median value. We then transformed these values to the probability domain using the  
461 invlogit function, subtracting the values from 0.5 and multiplying by 100. All results were still in  
462 the linear range of the logit function. We calculated 95% credible intervals the same way and  
463 reported them as parameter estimates ( $CDI_{95}$  lower-upper) in the text. These transformed values  
464 represent the additive probability (in %) of choosing a left (right) stimulus that is shown in the left  
465 (right) temporal field of view compared to presenting the left (right) stimulus in the nasal field of  
466 view, keeping all other factors constant.

467

## 468 **Reaction Times**

469 Initially, we did not plan to analyze the reaction time data. These analyses are purely explorative.  
470 Our setup consisted of a consumer keyboard, thus delays and jitters are to be expected. But with  
471 an average of 498 trials per subject, we did not expect a bias between conditions from jitter in our  
472 analyses. Our reaction time data were analyzed with a simple Bayesian mixed linear model:

473

$$474 \quad RT \sim 1 + Temporal_{selected} * Location + (1 + Temporal_{selected} * Location |subject)$$

475

476 Only trials without a visible inset stimulus were used. *Temporal selected* consists of all trials where  
477 a temporal stimulus was selected. Because of the bias described in the results, there is a slight

478 imbalance in the number of trials between the two conditions: 234.9 CI:[228.5, 241.3] for the nasal  
479 selection and 263.1 CI:[257.5, 269.4] for the temporal selection.

480

#### 481 **Bayesian Fit:**

482 We did not make use of prior information in the analysis of our data. We placed implicit, improper,  
483 uniform priors from negative to positive infinity on the mean and 0 to infinity for the standard  
484 deviations of our parameters, the default priors of STAN. An uninformative lkj-prior ( $\nu = 2$ ) was  
485 used for the correlation matrix, slightly emphasizing the diagonal over the off-diagonal of the  
486 correlation matrix <sup>32,33</sup>.

487 We used six mcmc-chains using 2000 iterations each, with 50% used for the warm-up  
488 period. We visually confirmed convergence through autocorrelation functions and trace plots, then  
489 calculated the scale reduction factors <sup>34</sup>, which indicated convergence as well (Rhat < 1.1).

490

#### 491 **Effects not reported in the result section**

492 We report other effects based on a combined model over all experiments. We did not find  
493 evidence for a different global bias (main effect location) in any of the four stimulation positions  
494 tested here. Dominant eye has a 12.3% effect ( $CDI_{95}$  2.78%-21.04%) on global bias; thus subjects  
495 with a dominant right eye also preferred the right stimulus over the left one (irrespective of whether  
496 the stimulus was visible through the left or the right eye). We find a global bias (in the intercept of  
497 -27.6%  $CDI_{95}$  -40.08% - -9.66%, with treatment coding) toward choosing the left stimulus; this  
498 might reflect that in the first two experiments we instructed subjects to use the right hand, thus  
499 they used their index and middle fingers. In the third experiment we instructed subjects to use  
500 both index fingers, resulting in a decreased bias to the left, with a shift more to the right (and thus  
501 more to balanced answers) of 12.24% ( $CDI_{95}$  -1.98-24.16%).

502 We did not find evidence for a bias due to handedness (5.22%,  $CDI_{95}$  -13.12%-23.46%).



503 There was a strong influence of the previous answer on the current answer. We observe a global  
504 effect of 9.57% ( $CDI_{95}$  1.7%-17.03%), and the coding suggests that subjects are more likely to  
505 choose the right stimulus again when they have just chosen “right” in the previous trial. For this  
506 effect it is more important to look at random effect variance, which is quite high with a standard  
507 deviation of 29.9% ( $CDI_{95}$  26.28%-33.7%), suggesting that there is large variation between  
508 subjects. Indeed, a closer look at the random slopes of the effect reveals three different strategies:  
509 Some subjects tend to stick the same answer, some subjects are balanced in their answers  
510 without any trend and some subjects tend to regularly alternate their answers in each trial.

511

512 Other models we considered showed no effect when both stimuli were in the temporal field, nor  
513 any three-way interaction. In order to simplify the final model, we removed these effects from  
514 future fits.

515

516

517 **REFERENCES**

- 518 1. Shadlen, M., Britten, K., Newsome, W. & Movshon, J. A computational analysis of the  
519 relationship between neuronal and behavioral responses to visual motion. *J. Neurosci.*  
520 **16**, 1486–1510 (1996).
- 521 2. Shadlen, M. N. & Newsome, W. T. Neural basis of a perceptual decision in the parietal  
522 cortex (area LIP) of the rhesus monkey. *J Neurophysiol* **86**, 1916–1936 (2001).
- 523 3. Wahn, B. & König, P. Attentional resource allocation in visuotactile processing depends  
524 on the task, but optimal visuotactile integration does not depend on attentional resources.  
525 *Front. Integr. Neurosci.* **10**, 13 (2016).
- 526 4. Wahn, B. & König, P. Audition and vision share spatial attentional resources, yet  
527 attentional load does not disrupt audiovisual integration. *Front. Psychol.* **6**, 1084 (2015).
- 528 5. Wahn, B. & König, P. Vision and haptics share spatial attentional resources and  
529 visuotactile integration is not affected by high attentional load. *Multisens. Res.* **28**, 371–  
530 392 (2015).
- 531 6. Quigley, C., Onat, S., Harding, S., Cooke, M. & König, P. Audio-visual integration during  
532 overt visual attention. *J. Eye Mov. Res.* **1**, 4 (2008).
- 533 7. Schall, S., Quigley, C., Onat, S. & König, P. Visual stimulus locking of EEG is modulated  
534 by temporal congruency of auditory stimuli. *Exp. Brain Res.* **198**, 137–51 (2009).
- 535 8. Hollensteiner, K. J., Pieper, F., Engler, G., König, P. & Engel, A. K. Crossmodal  
536 integration improves sensory detection thresholds in the ferret. *PLoS One* **10**, e0124952  
537 (2015).
- 538 9. Ernst, M. O. & Banks, M. S. Humans integrate visual and haptic information in a  
539 statistically optimal fashion. *Nature* **415**, 429–33 (2002).
- 540 10. Alais, D. & Burr, D. The ventriloquist effect results from near-optimal bimodal integration.  
541 *Curr. Biol.* **14**, 257–262 (2004).
- 542 11. Körding, K. P. & Wolpert, D. M. Bayesian integration in sensorimotor learning. *Nature*

- 543           **427**, 244–247 (2004).
- 544    12.    Tickle, H., Speekenbrink, M., Tsetsos, K., Michael, E. & Summerfield, C. Near-optimal  
545           integration of magnitude in the human parietal cortex. *J. Cogn. Neurosci.* **28**, 589–603  
546           (2016).
- 547    13.    Gu, Y., Angelaki, D. E. & Deangelis, G. C. Neural correlates of multisensory cue  
548           integration in macaque MSTd. *Nat. Neurosci.* **11**, 1201–10 (2008).
- 549    14.    Fetsch, C. R., Pouget, A., DeAngelis, G. C. & Angelaki, D. E. Neural correlates of  
550           reliability-based cue weighting during multisensory integration. *Nat. Neurosci.* **15**, 146–  
551           154 (2012).
- 552    15.    Heekeren, H. R., Marrett, S., Bandettini, P. A. & Ungerleider, L. G. A general mechanism  
553           for perceptual decision-making in the human brain. *Nature* **431**, 859–862 (2004).
- 554    16.    Bankó, E. M., Gál, V., Körtvélyes, J., Kovács, G. & Vidnyánszky, Z. Dissociating the  
555           effect of noise on sensory processing and overall decision difficulty. *J. Neurosci.* **31**,  
556           2663–2674 (2011).
- 557    17.    Tassinari, H., Hudson, T. E. & Landy, M. S. Combining priors and noisy visual cues in a  
558           rapid pointing task. *J. Neurosci.* **26**, 10154–10163 (2006).
- 559    18.    Ehinger, B. V., Konig, P. & Ossandon, J. P. Predictions of visual content across eye  
560           movements and their modulation by inferred information. *J. Neurosci.* **35**, 7403–7413  
561           (2015).
- 562    19.    Tong, F. & Engel, S. Interocular rivalry revealed in the human cortical blind-spot  
563           representation. *Nature* **411**, 195–9 (2001).
- 564    20.    Fahle, M. & Schmid, M. Naso-temporal asymmetry of visual perception and of the visual  
565           cortex. *Vision Res.* **28**, 293–300 (1988).
- 566    21.    Curcio, C. A., Sloan, K. R., Kalina, R. E. & Hendrickson, A. E. Human photoreceptor  
567           topography. *J. Comp. Neurol.* **292**, 497–523 (1990).
- 568    22.    Rovamo, J., Virsu, V., Laurinen, P. & Hyvärinen, L. Resolution of gratings oriented along

- 569 and across meridians in peripheral vision. *Invest. Ophthalmol. Vis. Sci.* **23**, 666–670  
570 (1982).
- 571 23. Pöppel, E., Held, R. & Frost, D. Residual visual function after brain wounds involving the  
572 central visual pathways in man. *Nature* **243**, 295–296 (1973).
- 573 24. Paradiso, M. A. & Carney, T. Orientation discrimination as a function of stimulus  
574 eccentricity and size: nasal/temporal retinal asymmetry. *Vision Res.* **28**, 867–874 (1988).
- 575 25. Crossland, M. D. & Bex, P. J. Spatial alignment over retinal scotomas. *Invest.*  
576 *Ophthalmol. Vis. Sci.* **50**, 1464–1469 (2009).
- 577 26. Komatsu, H. The neural mechanisms of perceptual filling-in. *Nat. Rev. Neurosci.* **7**, 220–  
578 31 (2006).
- 579 27. Brainard, D. H. The psychophysics toolbox. *Spat. Vis.* **10**, 433–436 (1997).
- 580 28. Cornelissen, F. W., Peters, E. M. & Palmer, J. The eyelink toolbox: eye tracking with  
581 MATLAB and the psychophysics toolbox. *Behav. Res. Methods, Instruments, Comput.*  
582 **34**, 613–617 (2002).
- 583 29. Awater, H. Cortical representation of space around the blind spot. *J. Neurophysiol.* **94**,  
584 3314–3324 (2005).
- 585 30. Wilcox, R. R. *Introduction to Robust Estimation and Hypothesis Testing*. (Academic  
586 Press, 2012).
- 587 31. Wolf, E. & Morandi, A. Retinal sensitivity in the region of the blind spot. *JOSA* **52**, 806–  
588 812 (1962).
- 589 32. Sorensen, T. & Vasissth, S. Bayesian linear mixed models using stan: a tutorial for  
590 psychologists, linguists, and cognitive scientists. *bioRxiv* 30 (2015). available at  
591 <<http://arxiv.org/abs/1506.06201>> (accessed 2016-04-01)
- 592 33. Carpenter, B. *et al.* Stan: a probabilistic programming language. *J. Stat. Softw.* **In Press**,  
593 (2016).
- 594 34. Gelman, A., Hwang, J. & Vehtari, A. Understanding predictive information criteria for

595 Bayesian models. *Stat. Comput.* **24**, 997–1016 (2014).

596

597 **ACKNOWLEDGEMENTS**

598 We thank Tim C. Kietzmann for his valuable suggestions on the design of the experiment and  
599 Frank Jäkel for his valuable discussions of the analysis. This work was supported by SPP 1665,  
600 H2020 socSMCs #641321 and SFB 936, project B1.

601

602

603

604 **SUPPLEMENTARY**

605

606

| Parameter        | Experiment 1<br>(95% CDI) | Experiment 2<br>(95% CDI) | Experiment 3<br>(95% CDI) | All Experiments<br>(95% CDI) |
|------------------|---------------------------|---------------------------|---------------------------|------------------------------|
| Location BS      | 15.01%<br>[8.49%,21.08%]  | 12.50%<br>[7.35%,17.49%]  | 13.18%<br>[6.47%,19.64%]  | 13.44%<br>[9.94%,16.70%]     |
| Location above   |                           | 6.63%<br>[0.77%,12.30%]   |                           | 6.73%<br>[1.91%,11.31%]      |
| Location outward |                           |                           | 4.80%<br>[0.58%,8.89%]    | 4.84%<br>[0.75%,8.79%]       |
| Location inward  |                           |                           | 2.85% [-<br>1.10%,6.65%]  | 2.89%<br>[-1.03%,6.63%]      |
| BS - above       |                           | 6.11%<br>[1.16%,10.78%]   |                           | 6.97%<br>[1.69%,12.24%]      |
| BS - outward     |                           |                           | 8.61%<br>[0.98%,16.04%]   | 8.86%<br>[3.73%,13.52%]      |
| BS - inward      |                           |                           | 10.51%<br>[3.55%,17.29%]  | 10.74%<br>[6.15%,15.09%]     |

607 **Table 1:** Overview of the results of all experiments individually and the combined estimates.

608 Empty cells indicate that the condition was not measured in this study.
